# Supplementary material
Source: ML conference proceedings conference paper supplement (https://openreview.net/forum?id=jGXnGsZ9Wk)
Supplement: supplementary_material [file VAE Hyper-Parameter Grid-Search Records.pdf › Supplementary Materials/AdditionalMaterials/VAE Hyper-Parameter Grid-Search Records.pdf]

## Hyperparameter Search Procedure

This document contains the raw training logs from hyperparameter search runs used in selecting the VAE architecture. Each experiment trained a **DualBranchVAE** on the balanced cell mask dataset with input shape (2,64,64,64).

Data was randomly split into an 80/20 train/validation split. Models were trained with the Adam optimizer, and a batch size of 2. A **ReduceLROnPlateau** scheduler halved the learning rate if validation loss plateaued. Early stopping was applied with a patience of 2 epochs, up to a maximum of 20 total epochs.

For each latent dimension considered (16, 32, and 64 dimensions), random candidate configurations from a potential grid of values were generated via the **sample\_hyperparams** function. Each configuration specified the learning rate, regularizing  $\beta$  value, convolutional stride, and base number of channels (in terms of latent dimension). Note that *stride* was fixed at 2 after it was observed all other candidate values performed very poorly.

The best-performing configuration on each latent dimension was retained based on minimum validation reconstruction loss. An increase in latent dimension consistently produces lower reconstruction loss, so this was a later trade-off to be weighed in order to keep the latent space compact.

The complete logs below provide detailed information for each run, including per-epoch validation losses and the final selected configuration. This table first quickly summarizes the results.

Table 1:

| Config | Latent Dim | LR     | beta | stride | base_channels | Total Epochs | Final Val Loss |
|--------|------------|--------|------|--------|---------------|--------------|----------------|
| 1/20   | 16         | 0.0005 | 1.0  | 2      | 4             | 8            | 28266.4226     |
| 2/20   | 16         | 0.0005 | 0.2  | 2      | 4             | 12           | 28077.4129     |
| 3/20   | 16         | 0.001  | 2.0  | 2      | 4             | 6            | 28940.0697     |
| 4/20   | 16         | 0.001  | 5.0  | 2      | 4             | 8            | 28261.2850     |
| 5/20   | 16         | 0.005  | 1.0  | 2      | 8             | 7            | 28689.9959     |
| 6/20   | 16         | 0.0005 | 2.0  | 2      | 8             | 7            | 28818.8120     |
| 7/20   | 16         | 0.005  | 5.0  | 2      | 8             | 8            | 29935.1423     |
| 8/20   | 16         | 0.0005 | 5.0  | 2      | 8             | 7            | 28675.1206     |
| 9/20   | 16         | 0.001  | 5.0  | 2      | 8             | 6            | 28356.4358     |
| 10/20  | 16         | 0.005  | 0.2  | 2      | 4             | 7            | 29308.6580     |
| 11/20  | 16         | 0.005  | 2.0  | 2      | 8             | 8            | 33980.4998     |
| 12/20  | 16         | 0.001  | 0.2  | 2      | 8             | 6            | 28918.4159     |
| 13/20  | 16         | 0.001  | 2.0  | 2      | 8             | 8            | 27952.4631     |
| 14/20  | 16         | 0.0005 | 0.5  | 2      | 8             | 8            | 28515.6237     |
| 15/20  | 16         | 0.0005 | 2.0  | 2      | 4             | 10           | 28007.2793     |
| 16/20  | 16         | 0.001  | 0.5  | 2      | 8             | 7            | 27643.2965     |
| 17/20  | 16         | 0.0005 | 0.2  | 2      | 8             | 9            | 28454.5825     |
| 18/20  | 16         | 0.0005 | 0.5  | 2      | 4             | 9            | 28095.0857     |
| 19/20  | 16         | 0.005  | 2.0  | 2      | 4             | 9            | 29491.6267     |
| 20/20  | 16         | 0.001  | 1.0  | 2      | 8             | 7            | 28696.7415     |
| 1/13   | 32         | 0.001  | 0.2  | 2      | 16            | 7            | 21085.5889     |
| 2/13   | 32         | 0.0005 | 1.0  | 2      | 16            | 9            | 20550.0626     |
| 3/13   | 32         | 0.005  | 5.0  | 2      | 16            | 8            | 23187.8756     |

|       |    |        |     |   |    |    |            |
|-------|----|--------|-----|---|----|----|------------|
| 4/13  | 32 | 0.005  | 0.5 | 2 | 16 | 10 | 28323.5683 |
| 5/13  | 32 | 0.001  | 1.0 | 2 | 16 | 8  | 20639.2045 |
| 6/13  | 32 | 0.0005 | 0.5 | 2 | 16 | 9  | 21139.1388 |
| 7/13  | 32 | 0.001  | 0.2 | 2 | 8  | 8  | 20799.2837 |
| 8/13  | 32 | 0.001  | 0.5 | 2 | 8  | 8  | 20933.9833 |
| 9/13  | 32 | 0.0005 | 5.0 | 2 | 16 | 8  | 21327.4789 |
| 10/13 | 32 | 0.005  | 0.2 | 2 | 16 | 3  | 29731.0945 |
| 11/13 | 32 | 0.0005 | 1.0 | 2 | 8  | 10 | 21110.6061 |
| 12/13 | 32 | 0.001  | 5.0 | 2 | 8  | 9  | 20902.4923 |
| 13/13 | 32 | 0.005  | 0.2 | 2 | 8  | 9  | 44957.5468 |
| 1/14  | 64 | 0.0005 | 0.5 | 2 | 16 | 9  | 16764.5864 |
| 2/14  | 64 | 0.0005 | 0.2 | 2 | 16 | 10 | 16455.6263 |
| 3/14  | 64 | 0.001  | 2.0 | 2 | 16 | 7  | 17131.1882 |
| 4/14  | 64 | 0.001  | 0.5 | 2 | 16 | 10 | 17041.2816 |
| 5/14  | 64 | 0.001  | 5.0 | 2 | 32 | 10 | 17730.3488 |
| 6/14  | 64 | 0.005  | 0.5 | 2 | 16 | 6  | 44311.3273 |
| 7/14  | 64 | 0.005  | 1.0 | 2 | 16 | 7  | 41545.0872 |
| 8/14  | 64 | 0.001  | 0.2 | 2 | 32 | 9  | 17074.4890 |
| 9/14  | 64 | 0.0005 | 0.2 | 2 | 32 | 9  | 16826.1244 |
| 10/14 | 64 | 0.005  | 2.0 | 2 | 16 | 7  | 44530.9266 |
| 11/14 | 64 | 0.001  | 1.0 | 2 | 16 | 9  | 17177.1059 |
| 12/14 | 64 | 0.005  | 2.0 | 2 | 32 | 8  | 58234.3451 |
| 13/14 | 64 | 0.001  | 5.0 | 2 | 16 | 10 | 17211.6154 |
| 14/14 | 64 | 0.001  | 0.5 | 2 | 32 | 9  | 16858.0226 |

Starting search for shape (2, 64, 64, 64), latent dimension 16

[1/20] Testing config: {'lr': 0.0005, 'beta': 1.0, 'stride': 2, 'base\_channels': 4}  
epoch number: 0  
Validation reconstruction loss: 38614.14793100878  
epoch number: 1  
Validation reconstruction loss: 32161.67421265178  
epoch number: 2  
Validation reconstruction loss: 30257.541484849306  
epoch number: 3  
Validation reconstruction loss: 29388.531331309627  
epoch number: 4  
Validation reconstruction loss: 28744.474052065263  
epoch number: 5  
Validation reconstruction loss: 28270.768968858414  
epoch number: 6  
Validation reconstruction loss: 28266.422603398743  
epoch number: 7  
Validation reconstruction loss: 28283.745931130747  
epoch number: 8  
Validation reconstruction loss: 28295.465755095403  
Completed config 1/20 with val loss: 28266.4226

[2/20] Testing config: {'lr': 0.0005, 'beta': 0.2, 'stride': 2, 'base\_channels': 4}  
epoch number: 0  
Validation reconstruction loss: 37842.17435494363  
epoch number: 1  
Validation reconstruction loss: 32526.942531033175  
epoch number: 2  
Validation reconstruction loss: 30533.96321416956  
epoch number: 3  
Validation reconstruction loss: 29695.233463654597  
epoch number: 4  
Validation reconstruction loss: 29270.087550140935  
epoch number: 5  
Validation reconstruction loss: 28927.37203219861  
epoch number: 6  
Validation reconstruction loss: 28729.371225878145  
epoch number: 7  
Validation reconstruction loss: 28349.78561022875  
epoch number: 8  
Validation reconstruction loss: 28360.23269798894  
epoch number: 9  
Validation reconstruction loss: 28145.73768328545  
epoch number: 10  
Validation reconstruction loss: 28077.4128597951  
epoch number: 11  
Validation reconstruction loss: 28090.632104428663  
epoch number: 12

Validation reconstruction loss: 28157.91733521249  
Completed config 2/20 with val loss: 28077.4129

[3/20] Testing config: {'lr': 0.001, 'beta': 2.0, 'stride': 2, 'base\_channels': 4}  
epoch number: 0  
Validation reconstruction loss: 34308.180487044665  
epoch number: 1  
Validation reconstruction loss: 31017.203226637033  
epoch number: 2  
Validation reconstruction loss: 29697.801492709237  
epoch number: 3  
Validation reconstruction loss: 29220.716693544015  
epoch number: 4  
Validation reconstruction loss: 28940.069665410883  
epoch number: 5  
Validation reconstruction loss: 29028.14581526453  
epoch number: 6  
Validation reconstruction loss: 29345.151008916957  
Completed config 3/20 with val loss: 28940.0697

[4/20] Testing config: {'lr': 0.001, 'beta': 5.0, 'stride': 2, 'base\_channels': 4}  
epoch number: 0  
Validation reconstruction loss: 36373.63548894189  
epoch number: 1  
Validation reconstruction loss: 30348.12324845512  
epoch number: 2  
Validation reconstruction loss: 30643.71156426171  
epoch number: 3  
Validation reconstruction loss: 28743.921963085428  
epoch number: 4  
Validation reconstruction loss: 28504.738420153946  
epoch number: 5  
Validation reconstruction loss: 28403.23590971921  
epoch number: 6  
Validation reconstruction loss: 28261.28496991544  
epoch number: 7  
Validation reconstruction loss: 28322.034248292497  
epoch number: 8  
Validation reconstruction loss: 28500.027550411967  
Completed config 4/20 with val loss: 28261.2850

[5/20] Testing config: {'lr': 0.005, 'beta': 1.0, 'stride': 2, 'base\_channels': 8}  
epoch number: 0  
Validation reconstruction loss: 31500.033943381397  
epoch number: 1  
Validation reconstruction loss: 30980.058339657415  
epoch number: 2  
Validation reconstruction loss: 29613.00237830659  
epoch number: 3

Validation reconstruction loss: 29043.572267318952  
epoch number: 4  
Validation reconstruction loss: 28976.094390313312  
epoch number: 5  
Validation reconstruction loss: 28689.995934518647  
epoch number: 6  
Validation reconstruction loss: 28838.584609442758  
epoch number: 7  
Validation reconstruction loss: 28974.30382019731  
Completed config 5/20 with val loss: 28689.9959

[6/20] Testing config: {'lr': 0.0005, 'beta': 2.0, 'stride': 2, 'base\_channels': 8}  
epoch number: 0  
Validation reconstruction loss: 35534.2476115297  
epoch number: 1  
Validation reconstruction loss: 31320.595867438205  
epoch number: 2  
Validation reconstruction loss: 29867.26336865785  
epoch number: 3  
Validation reconstruction loss: 29354.338515692758  
epoch number: 4  
Validation reconstruction loss: 29000.874224170642  
epoch number: 5  
Validation reconstruction loss: 28818.812025693842  
epoch number: 6  
Validation reconstruction loss: 29141.393392915223  
epoch number: 7  
Validation reconstruction loss: 28943.027018511493  
Completed config 6/20 with val loss: 28818.8120

[7/20] Testing config: {'lr': 0.005, 'beta': 5.0, 'stride': 2, 'base\_channels': 8}  
epoch number: 0  
Validation reconstruction loss: 33771.13996435928  
epoch number: 1  
Validation reconstruction loss: 32291.96728303881  
epoch number: 2  
Validation reconstruction loss: 31152.52118115785  
epoch number: 3  
Validation reconstruction loss: 30498.63004797268  
epoch number: 4  
Validation reconstruction loss: 30124.37773064831  
epoch number: 5  
Validation reconstruction loss: 30217.416068137467  
epoch number: 6  
Validation reconstruction loss: 29935.142318950562  
epoch number: 7  
Validation reconstruction loss: 30565.19690481353  
epoch number: 8  
Validation reconstruction loss: 30090.63121679857

Completed config 7/20 with val loss: 29935.1423

[8/20] Testing config: {'lr': 0.0005, 'beta': 5.0, 'stride': 2, 'base\_channels': 8}

epoch number: 0

Validation reconstruction loss: 34890.72486007968

epoch number: 1

Validation reconstruction loss: 30901.750274419992

epoch number: 2

Validation reconstruction loss: 29757.868561293908

epoch number: 3

Validation reconstruction loss: 28916.901269785343

epoch number: 4

Validation reconstruction loss: 28777.437354320253

epoch number: 5

Validation reconstruction loss: 28675.1206414652

epoch number: 6

Validation reconstruction loss: 29104.9770147848

epoch number: 7

Validation reconstruction loss: 28867.96196234009

Completed config 8/20 with val loss: 28675.1206

[9/20] Testing config: {'lr': 0.001, 'beta': 5.0, 'stride': 2, 'base\_channels': 8}

epoch number: 0

Validation reconstruction loss: 31421.328114836295

epoch number: 1

Validation reconstruction loss: 29644.038056293364

epoch number: 2

Validation reconstruction loss: 28541.671234686688

epoch number: 3

Validation reconstruction loss: 28404.820769866652

epoch number: 4

Validation reconstruction loss: 28356.43582298894

epoch number: 5

Validation reconstruction loss: 28428.408275964874

epoch number: 6

Validation reconstruction loss: 28618.239314559843

Completed config 9/20 with val loss: 28356.4358

[10/20] Testing config: {'lr': 0.005, 'beta': 0.2, 'stride': 2, 'base\_channels': 4}

epoch number: 0

Validation reconstruction loss: 33286.80738935115

epoch number: 1

Validation reconstruction loss: 30376.776435792497

epoch number: 2

Validation reconstruction loss: 30362.543585348005

epoch number: 3

Validation reconstruction loss: 30127.522302553123

epoch number: 4

Validation reconstruction loss: 29752.03795126843

epoch number: 5  
Validation reconstruction loss: 29308.65801679044  
epoch number: 6  
Validation reconstruction loss: 29430.729003482764  
epoch number: 7  
Validation reconstruction loss: 29773.778715849956  
Completed config 10/20 with val loss: 29308.6580

[11/20] Testing config: {'lr': 0.005, 'beta': 2.0, 'stride': 2, 'base\_channels': 8}  
epoch number: 0  
Validation reconstruction loss: 39162.4468167281  
epoch number: 1  
Validation reconstruction loss: 35235.65600945902  
epoch number: 2  
Validation reconstruction loss: 34917.701336188205  
epoch number: 3  
Validation reconstruction loss: 34659.78297105377  
epoch number: 4  
Validation reconstruction loss: 34532.54602802472  
epoch number: 5  
Validation reconstruction loss: 34504.93417308109  
epoch number: 6  
Validation reconstruction loss: 33980.499823829145  
epoch number: 7  
Validation reconstruction loss: 34370.29786426713  
epoch number: 8  
Validation reconstruction loss: 34784.30917308109  
Completed config 11/20 with val loss: 33980.4998

[12/20] Testing config: {'lr': 0.001, 'beta': 0.2, 'stride': 2, 'base\_channels': 8}  
epoch number: 0  
Validation reconstruction loss: 34581.95385848059  
epoch number: 1  
Validation reconstruction loss: 35070.49228574913  
epoch number: 2  
Validation reconstruction loss: 30972.55395740731  
epoch number: 3  
Validation reconstruction loss: 29236.512667362316  
epoch number: 4  
Validation reconstruction loss: 28918.415946173027  
epoch number: 5  
Validation reconstruction loss: 29873.382561795315  
epoch number: 6  
Validation reconstruction loss: 30792.551062445793  
Completed config 12/20 with val loss: 28918.4159

[13/20] Testing config: {'lr': 0.001, 'beta': 2.0, 'stride': 2, 'base\_channels': 8}  
epoch number: 0  
Validation reconstruction loss: 32029.762684301822



epoch number: 1  
Validation reconstruction loss: 29732.953047078274  
epoch number: 2  
Validation reconstruction loss: 28709.984818815046  
epoch number: 3  
Validation reconstruction loss: 28449.16850742628  
epoch number: 4  
Validation reconstruction loss: 28112.667379255203  
epoch number: 5  
Validation reconstruction loss: 28197.77839061145  
epoch number: 6  
Validation reconstruction loss: 27952.463107450672  
epoch number: 7  
Validation reconstruction loss: 28215.015276046182  
epoch number: 8  
Validation reconstruction loss: 28463.049134730052  
Completed config 13/20 with val loss: 27952.4631

[14/20] Testing config: {'lr': 0.0005, 'beta': 0.5, 'stride': 2, 'base\_channels': 8}  
epoch number: 0  
Validation reconstruction loss: 34468.71114416197  
epoch number: 1  
Validation reconstruction loss: 31209.91592923352  
epoch number: 2  
Validation reconstruction loss: 29716.220200021682  
epoch number: 3  
Validation reconstruction loss: 29108.51018233684  
epoch number: 4  
Validation reconstruction loss: 28835.193550791413  
epoch number: 5  
Validation reconstruction loss: 28787.139737369904  
epoch number: 6  
Validation reconstruction loss: 28515.623661779056  
epoch number: 7  
Validation reconstruction loss: 28679.081228317435  
epoch number: 8  
Validation reconstruction loss: 28839.744526845727  
Completed config 14/20 with val loss: 28515.6237

[15/20] Testing config: {'lr': 0.0005, 'beta': 2.0, 'stride': 2, 'base\_channels': 4}  
epoch number: 0  
Validation reconstruction loss: 38746.98764432459  
epoch number: 1  
Validation reconstruction loss: 32365.426150531224  
epoch number: 2  
Validation reconstruction loss: 30274.56316911047  
epoch number: 3  
Validation reconstruction loss: 29112.555429450345  
epoch number: 4

Validation reconstruction loss: 28556.698034678557  
epoch number: 5  
Validation reconstruction loss: 28266.4354062771  
epoch number: 6  
Validation reconstruction loss: 28222.433678447527  
epoch number: 7  
Validation reconstruction loss: 28070.482586188205  
epoch number: 8  
Validation reconstruction loss: 28007.279349387467  
epoch number: 9  
Validation reconstruction loss: 28621.18623970078  
epoch number: 10  
Validation reconstruction loss: 28099.91376267075  
Completed config 15/20 with val loss: 28007.2793

[16/20] Testing config: {'lr': 0.001, 'beta': 0.5, 'stride': 2, 'base\_channels': 8}  
epoch number: 0  
Validation reconstruction loss: 31841.465880447744  
epoch number: 1  
Validation reconstruction loss: 29468.62664990785  
epoch number: 2  
Validation reconstruction loss: 28487.932140340417  
epoch number: 3  
Validation reconstruction loss: 28041.138727775367  
epoch number: 4  
Validation reconstruction loss: 27999.968948192214  
epoch number: 5  
Validation reconstruction loss: 27643.29648200347  
epoch number: 6  
Validation reconstruction loss: 27714.50624390178  
epoch number: 7  
Validation reconstruction loss: 27828.42827474523  
Completed config 16/20 with val loss: 27643.2965

[17/20] Testing config: {'lr': 0.0005, 'beta': 0.2, 'stride': 2, 'base\_channels': 8}  
epoch number: 0  
Validation reconstruction loss: 35044.72616272767  
epoch number: 1  
Validation reconstruction loss: 31091.1448361611  
epoch number: 2  
Validation reconstruction loss: 29682.221924463356  
epoch number: 3  
Validation reconstruction loss: 29251.703592530357  
epoch number: 4  
Validation reconstruction loss: 28756.629668527752  
epoch number: 5  
Validation reconstruction loss: 28562.955748929424  
epoch number: 6  
Validation reconstruction loss: 28474.913513660016

epoch number: 7  
Validation reconstruction loss: 28454.58251741381  
epoch number: 8  
Validation reconstruction loss: 28702.569807702734  
epoch number: 9  
Validation reconstruction loss: 28814.722571552473  
Completed config 17/20 with val loss: 28454.5825

[18/20] Testing config: {'lr': 0.0005, 'beta': 0.5, 'stride': 2, 'base\_channels': 4}  
epoch number: 0  
Validation reconstruction loss: 48082.747581038595  
epoch number: 1  
Validation reconstruction loss: 34121.765879092585  
epoch number: 2  
Validation reconstruction loss: 30585.544703355376  
epoch number: 3  
Validation reconstruction loss: 29390.86045574046  
epoch number: 4  
Validation reconstruction loss: 28848.74185379174  
epoch number: 5  
Validation reconstruction loss: 28507.163810101367  
epoch number: 6  
Validation reconstruction loss: 28280.16937472897  
epoch number: 7  
Validation reconstruction loss: 28095.085659692108  
epoch number: 8  
Validation reconstruction loss: 28780.396431862533  
epoch number: 9  
Validation reconstruction loss: 28579.941231773093  
Completed config 18/20 with val loss: 28095.0857

[19/20] Testing config: {'lr': 0.005, 'beta': 2.0, 'stride': 2, 'base\_channels': 4}  
epoch number: 0  
Validation reconstruction loss: 34044.19114199371  
epoch number: 1  
Validation reconstruction loss: 31795.871801821337  
epoch number: 2  
Validation reconstruction loss: 30208.739192595403  
epoch number: 3  
Validation reconstruction loss: 30610.553803257804  
epoch number: 4  
Validation reconstruction loss: 29975.16120311145  
epoch number: 5  
Validation reconstruction loss: 29945.517525612533  
epoch number: 6  
Validation reconstruction loss: 29772.394876815913  
epoch number: 7  
Validation reconstruction loss: 29491.626660071553  
epoch number: 8

Validation reconstruction loss: 29741.944587489157  
epoch number: 9  
Validation reconstruction loss: 29517.68074791305  
Completed config 19/20 with val loss: 29491.6267

[20/20] Testing config: {'lr': 0.001, 'beta': 1.0, 'stride': 2, 'base\_channels': 8}  
epoch number: 0  
Validation reconstruction loss: 33014.60977816024  
epoch number: 1  
Validation reconstruction loss: 29965.67253902862  
epoch number: 2  
Validation reconstruction loss: 29325.84684484768  
epoch number: 3  
Validation reconstruction loss: 28750.464139066564  
epoch number: 4  
Validation reconstruction loss: 28835.473672620337  
epoch number: 5  
Validation reconstruction loss: 28696.741452325456  
epoch number: 6  
Validation reconstruction loss: 28754.265089711622  
epoch number: 7  
Validation reconstruction loss: 29019.337085998483  
Completed config 20/20 with val loss: 28696.7415

Starting search for shape (2, 64, 64, 64), latent dimension 32

[1/ 13] Testing config: {'lr': 0.001, 'beta': 0.2, 'stride': 2, 'base\_channels': 16}  
epoch number: 0  
Validation reconstruction loss: 25878.31300818517  
epoch number: 1  
Validation reconstruction loss: 22756.647155179424  
epoch number: 2  
Validation reconstruction loss: 21729.67775978426  
epoch number: 3  
Validation reconstruction loss: 25766.759738521792  
epoch number: 4  
Validation reconstruction loss: 21085.58894765015  
epoch number: 5  
Validation reconstruction loss: 21347.897250040656  
epoch number: 6  
Validation reconstruction loss: 21287.186785152862  
Completed config 1/ 13 with val loss: 21085.5889

[2/ 13] Testing config: {'lr': 0.0005, 'beta': 1.0, 'stride': 2, 'base\_channels': 16}  
epoch number: 0  
Validation reconstruction loss: 27806.968678854075  
epoch number: 1  
Validation reconstruction loss: 22973.079127818735  
epoch number: 2  
Validation reconstruction loss: 21526.806259486122  
epoch number: 3  
Validation reconstruction loss: 21173.5270388389  
epoch number: 4  
Validation reconstruction loss: 20671.501512697854  
epoch number: 5  
Validation reconstruction loss: 20719.029129173894  
epoch number: 6  
Validation reconstruction loss: 20550.062627046293  
epoch number: 7  
Validation reconstruction loss: 20599.979554016696  
epoch number: 8  
Validation reconstruction loss: 20758.00174307513  
Completed config 2/ 13 with val loss: 20550.0626

[3/ 13] Testing config: {'lr': 0.005, 'beta': 5.0, 'stride': 2, 'base\_channels': 16}  
epoch number: 0  
Validation reconstruction loss: 28574.634330279707  
epoch number: 1  
Validation reconstruction loss: 25121.82719332719  
epoch number: 2  
Validation reconstruction loss: 24207.906348249133  
epoch number: 3  
Validation reconstruction loss: 23954.390469156548  
epoch number: 4  
Validation reconstruction loss: 23974.71675791414  
epoch number: 5  
Validation reconstruction loss: 23187.875577637144  
epoch number: 6  
Validation reconstruction loss: 23477.082132887033  
epoch number: 7  
Validation reconstruction loss: 23992.41988630204  
Completed config 3/ 13 with val loss: 23187.8756

[4/ 13] Testing config: {'lr': 0.005, 'beta': 0.5, 'stride': 2, 'base\_channels': 16}  
epoch number: 0  
Validation reconstruction loss: 34770.87271655464  
epoch number: 1  
Validation reconstruction loss: 32401.36019148417  
epoch number: 2  
Validation reconstruction loss: 29529.993850959454  
epoch number: 3

Validation reconstruction loss: 30190.12548108196  
epoch number: 4  
Validation reconstruction loss: 28841.236458559193  
epoch number: 5  
Validation reconstruction loss: 28849.478524094753  
epoch number: 6  
Validation reconstruction loss: 28426.410556022332  
epoch number: 7  
Validation reconstruction loss: 28323.56832380204  
epoch number: 8  
Validation reconstruction loss: 28491.50050818517  
epoch number: 9  
Validation reconstruction loss: 29070.500789380963  
Completed config 4/ 13 with val loss: 28323.5683

[5/ 13] Testing config: {'lr': 0.001, 'beta': 1.0, 'stride': 2, 'base\_channels': 16}  
epoch number: 0  
Validation reconstruction loss: 25407.840695807132  
epoch number: 1  
Validation reconstruction loss: 22291.88536697745  
epoch number: 2  
Validation reconstruction loss: 21563.815904840634  
epoch number: 3  
Validation reconstruction loss: 20885.681749037834  
epoch number: 4  
Validation reconstruction loss: 20648.06848133944  
epoch number: 5  
Validation reconstruction loss: 20639.20453944872  
epoch number: 6  
Validation reconstruction loss: 20986.226664137033  
epoch number: 7  
Validation reconstruction loss: 21033.504695630963  
Completed config 5/ 13 with val loss: 20639.2045

[6/ 13] Testing config: {'lr': 0.0005, 'beta': 0.5, 'stride': 2, 'base\_channels': 16}  
epoch number: 0  
Validation reconstruction loss: 26832.855001219643  
epoch number: 1  
Validation reconstruction loss: 23786.792048934843  
epoch number: 2  
Validation reconstruction loss: 22627.622133835644  
epoch number: 3  
Validation reconstruction loss: 21631.11265110039  
epoch number: 4  
Validation reconstruction loss: 21686.69597652862  
epoch number: 5  
Validation reconstruction loss: 21326.296593804207  
epoch number: 6  
Validation reconstruction loss: 21139.138780287834

epoch number: 7  
Validation reconstruction loss: 21392.093719508888  
epoch number: 8  
Validation reconstruction loss: 21472.487810331742  
Completed config 6/ 13 with val loss: 21139.1388

[7/ 13] Testing config: {'lr': 0.001, 'beta': 0.2, 'stride': 2, 'base\_channels': 8}  
epoch number: 0  
Validation reconstruction loss: 25923.467864063856  
epoch number: 1  
Validation reconstruction loss: 22892.307192852884  
epoch number: 2  
Validation reconstruction loss: 21816.346661901018  
epoch number: 3  
Validation reconstruction loss: 21241.226010272116  
epoch number: 4  
Validation reconstruction loss: 21052.923965334994  
epoch number: 5  
Validation reconstruction loss: 20799.283692676712  
epoch number: 6  
Validation reconstruction loss: 20802.793700536644  
epoch number: 7  
Validation reconstruction loss: 20822.467061131287  
Completed config 7/ 13 with val loss: 20799.2837

[8/ 13] Testing config: {'lr': 0.001, 'beta': 0.5, 'stride': 2, 'base\_channels': 8}  
epoch number: 0  
Validation reconstruction loss: 26178.6063699317  
epoch number: 1  
Validation reconstruction loss: 23325.34682113237  
epoch number: 2  
Validation reconstruction loss: 21596.847495324695  
epoch number: 3  
Validation reconstruction loss: 21231.707461513444  
epoch number: 4  
Validation reconstruction loss: 21015.765197277484  
epoch number: 5  
Validation reconstruction loss: 20933.98327647306  
epoch number: 6  
Validation reconstruction loss: 21004.067343004663  
epoch number: 7  
Validation reconstruction loss: 21247.667674849577  
Completed config 8/ 13 with val loss: 20933.9833

[9/ 13] Testing config: {'lr': 0.0005, 'beta': 5.0, 'stride': 2, 'base\_channels': 16}  
epoch number: 0  
Validation reconstruction loss: 27130.8753049111  
epoch number: 1  
Validation reconstruction loss: 23515.044823625867

epoch number: 2  
Validation reconstruction loss: 22147.77761647604  
epoch number: 3  
Validation reconstruction loss: 22023.147048460538  
epoch number: 4  
Validation reconstruction loss: 21542.737751043474  
epoch number: 5  
Validation reconstruction loss: 21327.478857803013  
epoch number: 6  
Validation reconstruction loss: 21442.916578016586  
epoch number: 7  
Validation reconstruction loss: 21583.390946850606  
Completed config 9/ 13 with val loss: 21327.4789

[10/ 13] Testing config: {'lr': 0.005, 'beta': 0.2, 'stride': 2, 'base\_channels': 16}  
epoch number: 0  
Validation reconstruction loss: 29731.094541074912  
epoch number: 1  
Validation reconstruction loss: 47267.590727992196  
epoch number: 2  
Validation reconstruction loss: 47264.95128198179  
Completed config 10/ 13 with val loss: 29731.0945

[11/ 13] Testing config: {'lr': 0.0005, 'beta': 1.0, 'stride': 2, 'base\_channels': 8}  
epoch number: 0  
Validation reconstruction loss: 27743.053088410667  
epoch number: 1  
Validation reconstruction loss: 23826.389855946443  
epoch number: 2  
Validation reconstruction loss: 22419.790465091068  
epoch number: 3  
Validation reconstruction loss: 21801.912143254012  
epoch number: 4  
Validation reconstruction loss: 21466.931686361666  
epoch number: 5  
Validation reconstruction loss: 21113.509992614374  
epoch number: 6  
Validation reconstruction loss: 21278.85780640178  
epoch number: 7  
Validation reconstruction loss: 21110.60607349035  
epoch number: 8  
Validation reconstruction loss: 21415.8952816701  
epoch number: 9  
Validation reconstruction loss: 21294.631772414356  
Completed config 11/ 13 with val loss: 21110.6061

[12/ 13] Testing config: {'lr': 0.001, 'beta': 5.0, 'stride': 2, 'base\_channels': 8}  
epoch number: 0  
Validation reconstruction loss: 27059.990917037077



epoch number: 1  
Validation reconstruction loss: 23422.587126653296  
epoch number: 2  
Validation reconstruction loss: 22291.017982979185  
epoch number: 3  
Validation reconstruction loss: 21598.74780972192  
epoch number: 4  
Validation reconstruction loss: 21064.976506599633  
epoch number: 5  
Validation reconstruction loss: 21085.559876070576  
epoch number: 6  
Validation reconstruction loss: 20902.49230946444  
epoch number: 7  
Validation reconstruction loss: 20943.753804612967  
epoch number: 8  
Validation reconstruction loss: 21075.441612911967  
Completed config 12/ 13 with val loss: 20902.4923

[13/ 13] Testing config: {'lr': 0.005, 'beta': 0.2, 'stride': 2, 'base\_channels': 8}

epoch number: 0  
Validation reconstruction loss: 52359.46009052472  
epoch number: 1  
Validation reconstruction loss: 48660.7878530193  
epoch number: 2  
Validation reconstruction loss: 48294.2166359497  
epoch number: 3  
Validation reconstruction loss: 46175.411548677366  
epoch number: 4  
Validation reconstruction loss: 46159.7064417552  
epoch number: 5  
Validation reconstruction loss: 45173.85102043582  
epoch number: 6  
Validation reconstruction loss: 44957.54675981136  
epoch number: 7  
Validation reconstruction loss: 45941.38631220187  
epoch number: 8  
Validation reconstruction loss: 70725.17199018864  
Completed config 13/ 13 with val loss: 44957.5468

Starting search for shape (2, 64, 64, 64), latent dimension 64

[1/14] Testing config: {'lr': 0.0005, 'beta': 0.5, 'stride': 2, 'base\_channels': 16}

epoch number: 0

Validation reconstruction loss: 24019.505012399717

epoch number: 1

Validation reconstruction loss: 19989.992390774067

epoch number: 2

Validation reconstruction loss: 18514.793249945793

epoch number: 3

Validation reconstruction loss: 17859.24949350878

epoch number: 4

Validation reconstruction loss: 17103.39528675195

epoch number: 5

Validation reconstruction loss: 16906.196828585755

epoch number: 6

Validation reconstruction loss: 16764.58642789869

epoch number: 7

Validation reconstruction loss: 16816.20295983982

epoch number: 8

Validation reconstruction loss: 16815.12379221325

Completed config 1/14 with val loss: 16764.5864

[2/14] Testing config: {'lr': 0.0005, 'beta': 0.2, 'stride': 2, 'base\_channels': 16}

epoch number: 0

Validation reconstruction loss: 24737.746232653946

epoch number: 1

Validation reconstruction loss: 20227.19694208044

epoch number: 2

Validation reconstruction loss: 18214.487334331636

epoch number: 3

Validation reconstruction loss: 17406.16007663432

epoch number: 4

Validation reconstruction loss: 16972.379232335483

epoch number: 5

Validation reconstruction loss: 16754.872633551062

epoch number: 6

Validation reconstruction loss: 16876.66169859199

epoch number: 7

Validation reconstruction loss: 16455.626299260082

epoch number: 8

Validation reconstruction loss: 16615.905076939234

epoch number: 9

Validation reconstruction loss: 16936.938302932565

Completed config 2/14 with val loss: 16455.6263

[3/14] Testing config: {'lr': 0.001, 'beta': 2.0, 'stride': 2, 'base\_channels': 16}

epoch number: 0

Validation reconstruction loss: 23934.07365297051

epoch number: 1  
Validation reconstruction loss: 20120.717687892997  
epoch number: 2  
Validation reconstruction loss: 18529.841324262794  
epoch number: 3  
Validation reconstruction loss: 17877.87801015015  
epoch number: 4  
Validation reconstruction loss: 17131.188249573126  
epoch number: 5  
Validation reconstruction loss: 17136.08838102369  
epoch number: 6  
Validation reconstruction loss: 17134.883052194004  
Completed config 3/14 with val loss: 17131.1882

[4/14] Testing config: {'lr': 0.001, 'beta': 0.5, 'stride': 2, 'base\_channels': 16}

epoch number: 0  
Validation reconstruction loss: 28719.285369687772  
epoch number: 1  
Validation reconstruction loss: 23899.00690962435  
epoch number: 2  
Validation reconstruction loss: 20425.364675371315  
epoch number: 3  
Validation reconstruction loss: 18718.58921360039  
epoch number: 4  
Validation reconstruction loss: 17761.1680441308  
epoch number: 5  
Validation reconstruction loss: 17474.925472104023  
epoch number: 6  
Validation reconstruction loss: 17424.054663784693  
epoch number: 7  
Validation reconstruction loss: 17041.281643843507  
epoch number: 8  
Validation reconstruction loss: 17236.219538533987  
epoch number: 9  
Validation reconstruction loss: 17570.401305358304  
Completed config 4/14 with val loss: 17041.2816

[5/14] Testing config: {'lr': 0.001, 'beta': 5.0, 'stride': 2, 'base\_channels': 32}

epoch number: 0  
Validation reconstruction loss: 25469.277496205552  
epoch number: 1  
Validation reconstruction loss: 22316.724563638334  
epoch number: 2  
Validation reconstruction loss: 20085.25925574588  
epoch number: 3  
Validation reconstruction loss: 18482.355035098655  
epoch number: 4  
Validation reconstruction loss: 18016.820691944926  
epoch number: 5

Validation reconstruction loss: 18125.479872479402  
epoch number: 6  
Validation reconstruction loss: 17782.26850979781  
epoch number: 7  
Validation reconstruction loss: 17730.34882168799  
epoch number: 8  
Validation reconstruction loss: 18825.63202989484  
epoch number: 9  
Validation reconstruction loss: 18102.59263199263  
Completed config 5/14 with val loss: 17730.3488

[6/14] Testing config: {'lr': 0.005, 'beta': 0.5, 'stride': 2, 'base\_channels': 16}  
epoch number: 0  
Validation reconstruction loss: 47896.71444736557  
epoch number: 1  
Validation reconstruction loss: 45606.62671089007  
epoch number: 2  
Validation reconstruction loss: 44966.79201674978  
epoch number: 3  
Validation reconstruction loss: 44311.327298352124  
epoch number: 4  
Validation reconstruction loss: 46455.434271330225  
epoch number: 5  
Validation reconstruction loss: 58497.7058285451  
Completed config 6/14 with val loss: 44311.3273

[7/14] Testing config: {'lr': 0.005, 'beta': 1.0, 'stride': 2, 'base\_channels': 16}  
epoch number: 0  
Validation reconstruction loss: 48143.72127398634  
epoch number: 1  
Validation reconstruction loss: 44651.1150666739  
epoch number: 2  
Validation reconstruction loss: 43779.65100214115  
epoch number: 3  
Validation reconstruction loss: 41899.448039760406  
epoch number: 4  
Validation reconstruction loss: 41545.08720457502  
epoch number: 5  
Validation reconstruction loss: 41927.511291874456  
epoch number: 6  
Validation reconstruction loss: 58288.56905220078  
Completed config 7/14 with val loss: 41545.0872

[8/14] Testing config: {'lr': 0.001, 'beta': 0.2, 'stride': 2, 'base\_channels': 32}  
epoch number: 0  
Validation reconstruction loss: 24308.548890801172  
epoch number: 1  
Validation reconstruction loss: 19905.237158160777  
epoch number: 2

Validation reconstruction loss: 18254.201349739807  
epoch number: 3  
Validation reconstruction loss: 17253.44632378849  
epoch number: 4  
Validation reconstruction loss: 17140.11763470295  
epoch number: 5  
Validation reconstruction loss: 17283.551424951213  
epoch number: 6  
Validation reconstruction loss: 17074.48900456689  
epoch number: 7  
Validation reconstruction loss: 17626.078829683436  
epoch number: 8  
Validation reconstruction loss: 17667.031556605052  
Completed config 8/14 with val loss: 17074.4890

[9/14] Testing config: {'lr': 0.0005, 'beta': 0.2, 'stride': 2, 'base\_channels': 32}  
epoch number: 0  
Validation reconstruction loss: 25281.358373875217  
epoch number: 1  
Validation reconstruction loss: 20062.193940400044  
epoch number: 2  
Validation reconstruction loss: 18557.92271350553  
epoch number: 3  
Validation reconstruction loss: 17264.22529711893  
epoch number: 4  
Validation reconstruction loss: 16915.89035566186  
epoch number: 5  
Validation reconstruction loss: 17113.029969373372  
epoch number: 6  
Validation reconstruction loss: 16826.124422362856  
epoch number: 7  
Validation reconstruction loss: 17172.145813570576  
epoch number: 8  
Validation reconstruction loss: 17561.27307160668  
Completed config 9/14 with val loss: 16826.1244

[10/14] Testing config: {'lr': 0.005, 'beta': 2.0, 'stride': 2, 'base\_channels': 16}  
epoch number: 0  
Validation reconstruction loss: 48500.29740351257  
epoch number: 1  
Validation reconstruction loss: 48938.76270801713  
epoch number: 2  
Validation reconstruction loss: 44665.16940183218  
epoch number: 3  
Validation reconstruction loss: 47864.73175954033  
epoch number: 4  
Validation reconstruction loss: 44530.92655369145  
epoch number: 5  
Validation reconstruction loss: 58790.1340152049

epoch number: 6  
Validation reconstruction loss: 57536.65026357871  
Completed config 10/14 with val loss: 44530.9266

[11/14] Testing config: {'lr': 0.001, 'beta': 1.0, 'stride': 2, 'base\_channels': 16}  
epoch number: 0  
Validation reconstruction loss: 24785.069902563962  
epoch number: 1  
Validation reconstruction loss: 20421.480578856786  
epoch number: 2  
Validation reconstruction loss: 18447.759723276235  
epoch number: 3  
Validation reconstruction loss: 17854.54281968235  
epoch number: 4  
Validation reconstruction loss: 17269.00324222138  
epoch number: 5  
Validation reconstruction loss: 17343.368278404163  
epoch number: 6  
Validation reconstruction loss: 17177.105875298137  
epoch number: 7  
Validation reconstruction loss: 17329.610946986122  
epoch number: 8  
Validation reconstruction loss: 17296.708549029707  
Completed config 11/14 with val loss: 17177.1059

[12/14] Testing config: {'lr': 0.005, 'beta': 2.0, 'stride': 2, 'base\_channels': 32}  
epoch number: 0  
Validation reconstruction loss: 59231.92369769081  
epoch number: 1  
Validation reconstruction loss: 58682.03092137359  
epoch number: 2  
Validation reconstruction loss: 58627.468739836295  
epoch number: 3  
Validation reconstruction loss: 58460.29338884974  
epoch number: 4  
Validation reconstruction loss: 58554.533706228314  
epoch number: 5  
Validation reconstruction loss: 58234.345115324155  
epoch number: 6  
Validation reconstruction loss: 58313.65670059085  
epoch number: 7  
Validation reconstruction loss: 58455.46536548677  
Completed config 12/14 with val loss: 58234.3451

[13/14] Testing config: {'lr': 0.001, 'beta': 5.0, 'stride': 2, 'base\_channels': 16}  
epoch number: 0  
Validation reconstruction loss: 25148.104437134105  
epoch number: 1  
Validation reconstruction loss: 20482.53945719048

epoch number: 2  
Validation reconstruction loss: 18788.118915329575  
epoch number: 3  
Validation reconstruction loss: 17878.28954696986  
epoch number: 4  
Validation reconstruction loss: 17812.181221372237  
epoch number: 5  
Validation reconstruction loss: 17287.99892772929  
epoch number: 6  
Validation reconstruction loss: 17455.137872330335  
epoch number: 7  
Validation reconstruction loss: 17211.615379207775  
epoch number: 8  
Validation reconstruction loss: 17419.850485147443  
epoch number: 9  
Validation reconstruction loss: 17708.562212028402  
Completed config 13/14 with val loss: 17211.6154

[14/14] Testing config: {'lr': 0.001, 'beta': 0.5, 'stride': 2, 'base\_channels': 32}

epoch number: 0  
Validation reconstruction loss: 25869.907240961078  
epoch number: 1  
Validation reconstruction loss: 21200.043548081092  
epoch number: 2  
Validation reconstruction loss: 18441.080387270977  
epoch number: 3  
Validation reconstruction loss: 17395.75524701187  
epoch number: 4  
Validation reconstruction loss: 16872.06177837706  
epoch number: 5  
Validation reconstruction loss: 17344.234056537294  
epoch number: 6  
Validation reconstruction loss: 16858.02259560657  
epoch number: 7  
Validation reconstruction loss: 17389.20366537023  
epoch number: 8  
Validation reconstruction loss: 17732.958056937066  
Completed config 14/14 with val loss: 16858.0226
